# Supplementary material for: Assessment of the information provided by ChatGPT regarding exercise for patients with type 2 diabetes: a pilot study
Source: PubMed Central journal article supplement — BMJ Health Care Inform. 2024 Jul 4;31(1):e101006. doi: 10.1136/bmjhci-2023-101006 (PMC11227747; doi:10.1136/bmjhci-2023-101006), 2024-07-04
Supplement: bmjhci-2023-101006supp001.pdf [file bmjhci-2023-101006supp001.pdf]

**Supplementary Table 1. Answers generated by ChatGPT**

|                                                                                                                                                                                                                                                                                                                                                                                                                                                                                                                                                                                                                                                                                                                                                                                                                                                                                                                                                                                                                                                                                                                                                                                                                                                                                                                                                                                                                                                                                                                                                                                                                                                                                                                                                                                                                                                                                                                                                                                                                                                           |
|-----------------------------------------------------------------------------------------------------------------------------------------------------------------------------------------------------------------------------------------------------------------------------------------------------------------------------------------------------------------------------------------------------------------------------------------------------------------------------------------------------------------------------------------------------------------------------------------------------------------------------------------------------------------------------------------------------------------------------------------------------------------------------------------------------------------------------------------------------------------------------------------------------------------------------------------------------------------------------------------------------------------------------------------------------------------------------------------------------------------------------------------------------------------------------------------------------------------------------------------------------------------------------------------------------------------------------------------------------------------------------------------------------------------------------------------------------------------------------------------------------------------------------------------------------------------------------------------------------------------------------------------------------------------------------------------------------------------------------------------------------------------------------------------------------------------------------------------------------------------------------------------------------------------------------------------------------------------------------------------------------------------------------------------------------------|
| <p><b>1. What is the benefit of exercise for type 2 diabetes patients?</b></p> <p>Exercise offers numerous benefits for individuals with Type 2 diabetes, contributing to both short-term improvements and long-term health outcomes. Here are some key advantages:</p> <ol style="list-style-type: none"> <li><b>Improved Blood Sugar Control:</b> Physical activity helps muscles absorb blood sugar, reducing blood glucose levels. This can lead to a decrease in the need for diabetes medications.</li> <li><b>Increased Insulin Sensitivity:</b> Regular exercise makes the body more sensitive to insulin, which can help manage diabetes more effectively.</li> <li><b>Weight Management:</b> Exercise aids in weight loss and maintaining a healthy weight, which is particularly beneficial as obesity is a risk factor for worsening diabetes.</li> <li><b>Improved Heart Health:</b> People with Type 2 diabetes are at higher risk for heart diseases. Regular exercise improves cardiovascular health, reducing the risk of heart attack and stroke.</li> <li><b>Enhanced Mental Health:</b> Exercise has been shown to improve mood and reduce symptoms of depression and anxiety, which can be higher in individuals with chronic conditions like diabetes.</li> <li><b>Better Sleep:</b> Regular physical activity can improve sleep quality, which in turn can help in better overall health management.</li> <li><b>Increased Energy Levels and Physical Function:</b> Regular exercise improves overall physical strength and endurance, making daily activities easier.</li> <li><b>Reduced Risk of Diabetes-Related Complications:</b> Long-term, consistent exercise can help reduce the risk of complications associated with diabetes, such as neuropathy, kidney disease, and retinal damage.</li> </ol> <p>It's important for individuals with Type 2 diabetes to consult with their healthcare provider before starting any new exercise program, to ensure it's safe and effective for their specific health situation.</p> |
| <p><b>2. Which type of exercise training should type 2 diabetes patients do?</b></p> <p>For individuals with Type 2 diabetes, a combination of different types of exercise is often recommended to manage their condition effectively. Here are some key types of exercise training they should consider:</p> <ol style="list-style-type: none"> <li><b>Aerobic Exercise:</b> This type of exercise is critical for improving cardiovascular health and managing blood sugar levels. Activities such as brisk walking, jogging, cycling, swimming, or dancing are excellent</li> </ol>                                                                                                                                                                                                                                                                                                                                                                                                                                                                                                                                                                                                                                                                                                                                                                                                                                                                                                                                                                                                                                                                                                                                                                                                                                                                                                                                                                                                                                                                    |

choices. It's recommended to aim for at least 150 minutes of moderate-intensity aerobic exercise per week.

2. **Resistance Training:** Strength training, such as using weights, resistance bands, or body-weight exercises (like push-ups and squats), helps build muscle mass. This is important because increased muscle mass can improve blood sugar control. Engaging in resistance training at least two to three times per week is generally advised.
3. **Flexibility and Stretching Exercises:** These exercises are important for maintaining joint range of motion and reducing the risk of injury. Activities like yoga or simple stretching routines can be incorporated into the exercise regimen.
4. **Balance Training:** This is particularly important for older adults with Type 2 diabetes, as it helps prevent falls. Tai chi and certain yoga poses are good for improving balance.

It's important for Type 2 diabetes patients to start slowly, especially if they haven't been active for a while, and gradually increase the intensity and duration of their workouts. Additionally, they should monitor their blood sugar levels before, during, and after exercise, especially if they are on insulin or medications that increase insulin production, as exercise can lower blood sugar levels.

It's also vital to stay hydrated, wear appropriate footwear to prevent foot injuries, and be aware of the signs of hypoglycemia (low blood sugar) during and after exercise. As always, consulting with healthcare providers before starting any new exercise program is crucial to ensure safety and effectiveness.

### 3. How much intensity should be exercised in patients with type 2 diabetes?

The intensity of exercise for patients with Type 2 diabetes should be tailored to individual fitness levels, health status, and specific medical considerations. Here are general guidelines on exercise intensity:

1. **Moderate-Intensity Aerobic Exercise:** This is often recommended as a starting point. Moderate intensity means the exercise should cause a noticeable increase in heart rate and breathing, but you should still be able to talk during the activity. Examples include brisk walking, light jogging, or cycling at a steady, comfortable pace.
2. **Vigorous-Intensity Aerobic Exercise:** For those who are more physically fit, vigorous-intensity exercise might be appropriate. This level of exercise is more challenging, significantly increasing heart rate and breathing to the point where talking in full sentences might be difficult. Examples include running, fast cycling, or aerobic dancing.

3. **Resistance Training:** The intensity here varies based on the individual's strength and experience with such exercises. The weight or resistance level should be such that it allows for 10-15 repetitions of each exercise, with the last few repetitions being challenging but still maintainable with good form.
4. **Gradual Progression:** For those new to exercise or returning after a long break, it's important to start with lower intensity and gradually increase the intensity as fitness improves. This helps reduce the risk of injury and makes the exercise program sustainable.
5. **Monitoring Blood Sugar Levels:** It's crucial for individuals with Type 2 diabetes to monitor their blood sugar levels before, during, and after exercise to ensure they remain within a safe range. Exercise intensity might need to be adjusted based on these readings.
6. **Personalization:** The exercise program should be personalized based on the individual's health status, diabetes complications (if any), and overall fitness level. Consulting with healthcare providers or a certified fitness professional experienced in diabetes management is recommended for creating an appropriate exercise plan.
7. **Consistency and Variation:** Regular physical activity is key. Ideally, some form of exercise should be done most days of the week. Incorporating a variety of activities can help prevent boredom and overuse injuries.

Remember, the best exercise intensity is one that is safe, enjoyable, and sustainable for the individual. It's not about pushing to extremes but about finding a comfortable level that offers health benefits without causing undue strain or risk.

#### 4. How often should type 2 diabetes patients exercise?

For individuals with Type 2 diabetes, regular exercise is crucial for managing the condition effectively. Here are guidelines on how often they should exercise:

1. **Aerobic Exercise:** It's recommended to engage in aerobic activities at least 150 minutes per week. This can be broken down into 30 minutes a day, five days a week. Alternatively, this can be split into shorter sessions (such as three 10-minute sessions) per day.
2. **Resistance Training:** Incorporating strength training exercises is also important. It's generally advised to do resistance training at least two to three times per week, ensuring that all major muscle groups are worked. There should be a day of rest between these sessions to allow muscles to recover.
3. **Flexibility and Balance Exercises:** Activities like stretching, yoga, or tai chi can be done daily. These exercises are particularly beneficial for

flexibility and balance, which can aid in preventing falls and maintaining mobility.

4. **Consistency Over Intensity:** The key is consistent physical activity rather than sporadic high-intensity workouts. Regular exercise helps in maintaining stable blood sugar levels and aids in overall diabetes management.
5. **Monitoring and Adjustment:** Those with Type 2 diabetes should monitor their blood sugar levels in relation to their exercise habits. This can help in understanding how different types and intensities of exercise affect blood glucose levels and can guide adjustments in the exercise regimen.
6. **Gradual Increase:** For those who are not used to regular physical activity, it's important to start slowly and gradually increase the duration and intensity of exercise.
7. **Incorporate Physical Activity into Daily Routine:** In addition to structured exercise, incorporating more physical activity into daily life, like walking more, taking the stairs, and doing household chores, can be beneficial.

It's essential for individuals with Type 2 diabetes to consult with their healthcare provider before starting any new exercise program, especially if they have any diabetes-related complications or other health issues. The healthcare provider can offer personalized advice based on the individual's overall health, fitness level, and specific needs.

#### 5. How long should type 2 diabetes patients exercise?

For individuals with Type 2 diabetes, the duration of each exercise session can vary based on the type of exercise, overall fitness level, and specific health considerations. Here are some general guidelines:

1. **Aerobic Exercise:** The American Diabetes Association recommends at least 150 minutes of moderate-intensity aerobic activity per week. This can be divided into sessions of at least 30 minutes on most days of the week. Alternatively, for those who prefer or are more suited to vigorous-intensity aerobic activity, 75 minutes per week is recommended, which can be divided into shorter sessions.
2. **Resistance Training:** Each session of resistance or strength training should typically last around 20-30 minutes, targeting all major muscle groups. This should be done at least two to three times per week on non-consecutive days to allow for muscle recovery.
3. **Flexibility and Balance Training:** Sessions for flexibility exercises, such as yoga or stretching, can vary in length but are often beneficial when

performed for 10-30 minutes. These can be done daily.

4. **Breaking Down Sessions:** For those who find it challenging to exercise for longer periods, breaking down exercise into shorter sessions (such as three 10-minute sessions) is an effective approach.
5. **Individualized Duration:** The duration of exercise sessions should be individualized based on the person's current fitness level, health status, and how their body responds to exercise. Those new to exercise or returning after a long break should start with shorter sessions and gradually increase the duration.
6. **Continuous Monitoring:** Individuals with Type 2 diabetes should monitor their blood sugar levels before, during, and after exercise to understand how different durations and types of physical activity affect their glucose levels.

It's important to remember that more important than the length of each individual exercise session is the overall amount of physical activity accumulated throughout the week. Regular physical activity, even in shorter durations, can significantly benefit blood sugar management, cardiovascular health, and overall well-being in individuals with Type 2 diabetes. Consulting with healthcare professionals for personalized advice is always recommended.

#### 6. How much weight should type 2 diabetes patients lose to achieve metabolic benefits?

For individuals with Type 2 diabetes, losing weight can lead to significant metabolic benefits, and even modest weight loss can have a substantial impact. Here are key points regarding weight loss for metabolic benefits in Type 2 diabetes:

1. **Modest Weight Loss:** Research indicates that losing 5-10% of body weight can significantly improve blood sugar control, as well as reduce the risk of cardiovascular disease and other complications associated with diabetes.
2. **Greater Benefits with More Weight Loss:** While even modest weight loss is beneficial, more significant weight loss can lead to even greater improvements. For example, some individuals may experience partial remission of their diabetes with more substantial weight loss.
3. **Individualized Goals:** The exact amount of weight an individual should aim to lose for optimal benefits can vary. It's important to set realistic and individualized weight loss goals based on one's current weight, overall health, and other individual factors.
4. **Sustained Weight Loss:** It's not just about losing weight, but also about maintaining that weight loss over time. Long-term lifestyle changes involving diet, exercise, and often behavior modification are

key to sustaining weight loss.

5. **Medical Supervision:** For individuals with Type 2 diabetes, it's important to undertake weight loss under medical supervision. This is especially crucial for those who are on medications for diabetes, as weight loss can significantly impact blood sugar levels and may require adjustments in medication.
6. **Comprehensive Approach:** Weight loss should be part of a comprehensive approach to managing Type 2 diabetes, which includes not only dietary changes and increased physical activity but also regular monitoring of blood sugar levels and medical check-ups.
7. **Non-Scale Victories:** Besides weight loss, improvements in other areas such as increased physical fitness, better control of blood sugar levels, reduced need for medications, and overall enhanced well-being are also important markers of success.

It's important for individuals with Type 2 diabetes to work closely with their healthcare providers to determine the most appropriate and safe weight loss goals and strategies for their specific situation.

#### 7. Do type 2 diabetes patients require exercise stress testing before starting exercise?

Whether Type 2 diabetes patients require exercise stress testing before starting an exercise program depends on several factors, including their current health status, age, and presence of any diabetes-related complications or other medical conditions. Here are some considerations:

1. **Presence of Cardiovascular Disease or Symptoms:** If a patient with Type 2 diabetes has known cardiovascular disease, or symptoms suggestive of heart disease (such as chest pain, severe shortness of breath, or dizziness during exertion), an exercise stress test may be recommended before starting a new exercise regimen.
2. **Age and Other Risk Factors:** The American Diabetes Association suggests that individuals with diabetes who are over 40 years old and have one or more additional risk factors for heart disease (like smoking, high blood pressure, high cholesterol, family history of heart disease, or being overweight) should consider having a stress test before engaging in vigorous physical activity.
3. **Asymptomatic Individuals:** For those who are younger and have no symptoms or known heart disease, and fewer risk factors, the need for a stress test before starting moderate-intensity exercise is less clear. It might not be necessary in these cases.
4. **Type and Intensity of Exercise:** The type and intensity of the planned exercise also play a role in determining the need for a stress test.

Moderate-intensity activities like brisk walking might not require prior testing, but a more vigorous program might.

5. **Monitoring During Exercise:** For those who are at higher risk or have existing health issues, it might be advisable to start exercising under supervision or in a setting where emergency assistance is available.
6. **Consulting Healthcare Providers:** It's important for individuals with Type 2 diabetes to consult their healthcare providers before starting any new exercise program. The healthcare provider can assess their overall health, review any potential risks, and determine if an exercise stress test or other evaluations are necessary.

In summary, the need for an exercise stress test in Type 2 diabetes patients is individualized. It depends on age, the presence of cardiovascular risk factors, symptoms, and the type and intensity of the planned exercise. It's crucial to have a tailored approach based on a thorough medical evaluation.

#### 8. How should type 2 diabetes patients prevent hypoglycemia during exercise?

Preventing hypoglycemia (low blood sugar) during exercise is crucial for individuals with Type 2 diabetes, especially those who are on insulin or medications that increase insulin production. Here are strategies to help prevent hypoglycemia during exercise:

1. **Monitor Blood Sugar Levels:** Check blood glucose before, during, and after exercise to understand how different activities affect your levels. It's especially important to check if you're trying a new exercise or altering your routine.
2. **Adjust Medication as Needed:** Speak with your healthcare provider about adjusting your medication regimen on days you exercise, especially if you're taking insulin or sulfonylureas, which can increase the risk of hypoglycemia.
3. **Eat a Carbohydrate Snack if Necessary:** If your blood sugar is low before starting exercise (generally under 100 mg/dL), eat a small carbohydrate snack, like fruit, crackers, or a granola bar, before beginning. This can help prevent a drop in blood sugar levels.
4. **Stay Hydrated:** Dehydration can affect blood sugar levels. Drink water before, during, and after exercise.
5. **Carry Fast-Acting Carbohydrates:** Have a source of fast-acting carbohydrates, like glucose tablets, candy, or juice, with you in case you need to quickly treat hypoglycemia.
6. **Be Aware of the Timing of Exercise:** Exercising after a meal when blood sugar levels are higher can help reduce the risk of hypoglycemia. However, monitor how different times of day affect your blood sugar in

relation to exercise.

7. **Understand the Effects of Different Types of Exercise:** Aerobic exercise tends to lower blood sugar levels, but high-intensity or anaerobic exercise can sometimes raise blood sugar temporarily. Be mindful of how different activities impact your glucose levels.
8. **Wear a Medical ID:** Always wear a medical ID bracelet or carry identification that states you have diabetes. This is important in case of an emergency.
9. **Educate Exercise Partners:** If you exercise with others, let them know about your diabetes and what to do in case of hypoglycemia.
10. **Gradual Cool Down:** After intense exercise, gradually cooling down instead of stopping abruptly can help prevent rapid changes in blood glucose levels.
11. **Regularly Review Your Plan:** Regularly review your diabetes management plan with your healthcare provider, particularly if you're making changes to your exercise routine.

Remember, individual responses to exercise can vary. It's important for people with Type 2 diabetes to learn how their bodies react to different forms and intensities of exercise, and to plan their glucose management accordingly.

### 9. How should type 2 diabetes patients prevent hyperglycemia during exercise?

Preventing hyperglycemia (high blood sugar) during exercise is important for individuals with Type 2 diabetes. Here are strategies to help manage blood sugar levels and reduce the risk of hyperglycemia during physical activity:

1. **Monitor Blood Sugar Levels:** Check your blood glucose before, during, and after exercise. Understanding how your body responds to different types of physical activity is crucial in managing blood sugar levels effectively.
2. **Understand the Type of Exercise:** Certain high-intensity exercises, like sprinting or heavy lifting, can cause a temporary rise in blood sugar levels. Knowing this can help you plan your exercise routine and blood sugar management more effectively.
3. **Stay Hydrated:** Dehydration can cause blood sugar levels to rise. Ensure you drink plenty of water before, during, and after exercise.
4. **Adjust Medication if Needed:** Consult with your healthcare provider about how to adjust your diabetes medications around your exercise schedule, especially if you frequently experience fluctuations in your blood sugar levels.
5. **Time Your Exercise Appropriately:** Exercising after a meal can help prevent blood sugar spikes, as your body will use the glucose from your



meal for energy during the exercise.

6. **Eat a Balanced Meal or Snack:** If you exercise several hours after a meal, have a small snack that includes carbohydrates and protein before starting. This can help stabilize blood sugar levels.
7. **Avoid Exercising When Blood Sugar is High:** If your blood sugar is already high before you start exercising (generally over 250 mg/dL), it's better to wait until it comes down to avoid further increasing your blood sugar.
8. **Be Mindful of Duration and Intensity:** Longer duration and high-intensity workouts may have different effects on your blood sugar. Adjust your activity accordingly and monitor your response.
9. **Cool Down Properly:** After vigorous exercise, a proper cool-down period can help regulate blood sugar levels.
10. **Keep Track of Your Blood Sugar Trends:** Keeping a record of your blood sugar levels in relation to your exercise routine can help you and your healthcare provider make more informed decisions about managing your diabetes.
11. **Consult Healthcare Providers Regularly:** Regular consultations with your healthcare provider are important to tailor your diabetes management plan, especially if you're frequently experiencing high blood sugar levels during or after exercise.

Remember, individual responses to exercise can vary significantly. It's important for people with Type 2 diabetes to closely monitor their blood sugar levels and work with their healthcare team to effectively manage their condition in relation to physical activity.

#### 10. Which kind of exercise should diabetic neuropathy patients do?

For patients with diabetic neuropathy, engaging in regular exercise is important, but it's crucial to choose activities that are safe and less likely to cause injury due to the nerve damage and potential loss of sensation, especially in the feet. Here are some types of exercise that are generally considered suitable:

1. **Low-Impact Aerobic Exercise:** Activities like walking, swimming, and stationary cycling are excellent as they are low-impact and less stressful on the feet and joints. These exercises improve cardiovascular fitness and blood flow, which is beneficial for nerve health.
2. **Strength Training:** Strength training can help maintain muscle mass and improve overall strength, but it should be done with care. Using light weights or resistance bands for upper and lower body exercises is effective. Focus on controlled movements and avoid heavy lifting that puts excessive stress on the feet.

3. **Balance and Flexibility Exercises:** Activities such as tai chi, yoga, or gentle stretching can improve flexibility, balance, and coordination, reducing the risk of falls, which is important for those with neuropathy.
4. **Non-Weight Bearing Exercises:** If neuropathy is severe, especially in the lower limbs, non-weight-bearing exercises like swimming or using a hand cycle may be the safest options.
5. **Daily Activity and Movement:** Incorporating more physical activity into daily routines, such as light walking or household chores, can also be beneficial, provided that it's done safely and comfortably.

#### Safety Tips for Exercise with Diabetic Neuropathy:

- **Foot Care:** Regularly check your feet for blisters, cuts, or sores, as neuropathy can decrease sensation and increase the risk of unnoticed injuries. Wear well-fitted, comfortable shoes and moisture-wicking socks.
- **Start Slowly:** Begin with low-intensity exercises and gradually increase intensity and duration to avoid overexertion.
- **Monitor Blood Sugar Levels:** Exercise can affect blood glucose levels, so monitoring these levels before and after exercise is important.
- **Stay Hydrated:** Drink plenty of water before, during, and after exercising.
- **Consult Healthcare Providers:** Before starting any new exercise program, it's crucial to consult with healthcare providers, especially to tailor the exercise plan according to the severity and specifics of the neuropathy and overall health status.

Remember, every individual's condition is different, and what works for one person may not be suitable for another. It's essential to work closely with healthcare providers to develop an exercise plan that is safe, effective, and tailored to the individual's needs and capabilities.

#### 11. Which kind of exercise should diabetic retinopathy patients do?

For patients with diabetic retinopathy, exercise remains an important aspect of managing overall health, but certain precautions are necessary to avoid exacerbating the condition. Here are some types of exercise generally considered suitable for those with diabetic retinopathy:

1. **Low to Moderate-Intensity Aerobic Exercise:** Activities like brisk walking, stationary cycling, or swimming are beneficial. They improve cardiovascular health and aid in blood sugar control without putting excessive strain on the eyes.

2. **Strength Training:** Light to moderate strength training is generally safe. Use light weights or resistance bands, and focus on controlled, smooth movements. Avoid heavy lifting and straining, which can increase pressure in the eyes.
3. **Balance and Flexibility Exercises:** Practices like tai chi, yoga, and gentle stretching can help improve balance and flexibility, reducing the risk of falls and promoting overall well-being. However, it's important to avoid positions that significantly increase pressure in the head and eyes, such as inverted yoga poses.
4. **Non-Impact Exercises:** Activities like using an elliptical trainer or rowing machine can provide a good workout without the jarring impact that might be harmful.

#### Safety Tips for Exercise with Diabetic Retinopathy:

- **Avoid High-Intensity and Contact Sports:** Exercises that involve heavy lifting, straining, or contact sports should be avoided as they can increase intraocular pressure or risk injury.
- **Monitor Blood Pressure and Blood Sugar:** Both high blood pressure and uncontrolled blood sugar can worsen diabetic retinopathy, so it's important to monitor these closely, especially in relation to exercise.
- **Regular Eye Examinations:** Keep up with regular eye examinations and consult with your eye doctor regarding your exercise routine to ensure it's safe for your eyes.
- **Use Caution with Head-Down Activities:** Avoid activities that involve bending over for extended periods or any exercise that involves having the head lower than the heart for prolonged times.
- **Listen to Your Body:** Pay attention to any changes in vision during or after exercise and consult a healthcare professional if you experience any unusual symptoms.
- **Stay Hydrated and Rested:** Adequate hydration and rest are important, as fatigue or dehydration can impact both your blood sugar levels and eye health.

It's essential for individuals with diabetic retinopathy to consult with their healthcare provider, including their eye specialist, before starting or modifying their exercise routine. The healthcare provider can provide recommendations based on the severity of the retinopathy, overall health status, and any other complications associated with diabetes.

#### 12. What kind of exercise should diabetic kidney patients do?

For patients with diabetic kidney disease (also known as diabetic nephropathy),

exercise is important but must be tailored to avoid overburdening the kidneys. Here are some types of exercise generally considered appropriate:

1. **Low to Moderate-Intensity Aerobic Exercise:** Activities like walking, swimming, and stationary cycling are excellent choices. They improve cardiovascular health, help control blood sugar, and manage blood pressure without putting excessive strain on the kidneys.
2. **Strength Training:** Light to moderate strength training can help maintain muscle mass and overall strength. Use light weights or resistance bands and focus on controlled movements. Avoid heavy lifting and high-intensity resistance exercises that can increase blood pressure.
3. **Flexibility and Balance Exercises:** Gentle stretching, yoga, and tai chi can improve flexibility, balance, and mental well-being. These activities are low-impact and can be easily adapted to individual fitness levels.
4. **Non-Impact Exercises:** Non-impact exercises like using a rowing machine or elliptical trainer can provide a good cardiovascular workout without the jarring impact that could be harmful.

Safety Tips for Exercise with Diabetic Kidney Disease:

- **Avoid High-Intensity Exercises:** Intense exercises can lead to muscle breakdown and increase protein in the urine, which can be harmful to already compromised kidneys.
- **Monitor Blood Pressure:** High blood pressure can exacerbate kidney problems, so it's important to monitor it closely, especially in relation to exercise.
- **Stay Hydrated:** Proper hydration is important, but fluid intake might need to be monitored or limited in advanced kidney disease, so it's essential to follow your healthcare provider's recommendations.
- **Regular Medical Checkups:** Regular checkups with your healthcare provider are important to monitor kidney function and overall health status.
- **Adjust Exercise According to Energy Levels:** Kidney disease can lead to fatigue. It's important to adjust the intensity and duration of exercise according to your energy levels.
- **Consult Healthcare Providers:** Before starting any new exercise program, consult with healthcare providers. They can provide guidance based on the stage of kidney disease, overall health, and any other complications related to diabetes.
- **Listen to Your Body:** Pay attention to how your body responds during and after exercise. If you feel unusually tired, dizzy, or experience any

discomfort, stop exercising and consult with your healthcare provider.

Individual responses to exercise can vary significantly, especially with a condition like diabetic kidney disease. It's crucial for patients to work closely with their healthcare team to develop an exercise plan that is safe, effective, and tailored to their individual needs and capabilities.

### 13. When should type 2 diabetes patients exercise before or after meals?

The timing of exercise in relation to meals for Type 2 diabetes patients can affect blood sugar control. Here are some considerations for deciding whether to exercise before or after meals:

#### 1. Exercising After Meals:

- **Benefits:** Exercising after meals, especially after breakfast or lunch, can be beneficial as it helps in utilizing the glucose absorbed from the meal, leading to better blood sugar control.
- **Timing:** Typically, waiting about 30 minutes to an hour after eating is advised before starting exercise. This allows some time for digestion and avoids discomfort while exercising.
- **Blood Sugar Monitoring:** It's important to monitor blood sugar levels before and after exercise to understand how your body responds to physical activity after eating.

#### 2. Exercising Before Meals:

- **Benefits:** Exercising before eating, particularly in the morning, can increase insulin sensitivity and muscle glucose uptake for the rest of the day.
- **Considerations:** However, exercising on an empty stomach might increase the risk of hypoglycemia (low blood sugar), especially for those on insulin or insulin-stimulating medications.
- **Blood Sugar Monitoring:** If you choose to exercise before meals, it's crucial to check your blood sugar levels before starting and have a snack handy if your levels are low.

#### 3. Individual Variability:

- Every individual's response to exercise can vary. Some people may find that their blood sugar levels are more stable when they exercise after eating, while others may have better control when they exercise before meals.

#### 4. Type and Intensity of Exercise:

- The impact of exercise on blood sugar also depends on the type and intensity of the activity. Aerobic exercises tend to lower blood sugar levels more than resistance exercises.

#### 5. Consultation with Healthcare Provider:

- It's important to work with healthcare providers to determine the best timing for exercise. They can help tailor advice based on your medication, meal plan, and blood sugar patterns.

#### 6. **Consistency:**

- Consistency in the timing of exercise can also help in managing blood sugar levels more effectively. Keeping a regular schedule helps in predicting and understanding how your body responds to physical activity.

Remember, regular monitoring of blood sugar levels is key to determining the best time for you to exercise. Adjustments to medication and meals might also be necessary based on your exercise routine and blood sugar readings.

### 14. Which time of the day should type 2 diabetes patients exercise?

The best time of day for Type 2 diabetes patients to exercise can vary based on individual preferences, lifestyle, blood sugar control, and how exercise impacts their glucose levels. Here are some considerations:

#### 1. **Morning Exercise:**

- **Benefits:** Some people find that exercising in the morning helps improve their blood sugar control for the rest of the day. Morning exercise can also be a good way to ensure that it gets done before other responsibilities and distractions arise.
- **Considerations:** Morning blood sugar levels can be higher due to the dawn phenomenon (a natural rise in blood sugar in the early morning hours). Exercising in the morning may help counteract this effect.

#### 2. **Afternoon or Evening Exercise:**

- **Benefits:** For others, exercising later in the day, after meals, can be more effective in managing postprandial (after-meal) blood glucose spikes.
- **Considerations:** It's important to be aware of the risk of hypoglycemia (low blood sugar), especially if exercising after taking diabetes medications that increase insulin production. Monitoring blood sugar levels before and after exercise is crucial.

#### 3. **Consistent Timing:**

- Consistency in the timing of exercise can aid in better overall blood sugar management. It helps the body adapt to a routine and makes blood sugar levels more predictable.

#### 4. **Individual Blood Sugar Responses:**

- Monitoring how different times of day affect your blood sugar in relation to exercise is important. This can help you identify the

optimal time for physical activity.

5. **Personal Schedule and Preferences:**

- The best time to exercise is also one that fits seamlessly into your daily routine and aligns with your personal preferences. You're more likely to stick with an exercise habit if it's convenient and enjoyable for you.

6. **Avoid Late Night Exercise:**

- Exercising too close to bedtime may interfere with sleep for some people. Good sleep is important for overall health and blood sugar control.

7. **Consult Healthcare Providers:**

- Discuss your exercise plan and its timing with your healthcare provider, especially if you are on medications for diabetes. They can provide guidance based on your medication regimen, meal plan, and daily schedule.

Ultimately, the best time to exercise may vary from person to person. The key is to find a time that works best for you, helps you manage your blood sugar effectively, and fits into your daily life consistently. Regular monitoring and adjustments based on how your body responds are essential components of effective diabetes management.
